# Supplementary material for: Evaluation of Cattle for Naturally Colonized Shiga Toxin-Producing Escherichia coli Requires Combinatorial Strategies
Source: Hindawi journal article supplement (doi:10.1155/2021/6673202), 2021-04-01
Supplement: f1 [file 6673202.f1.zip]

**I.**

**A**

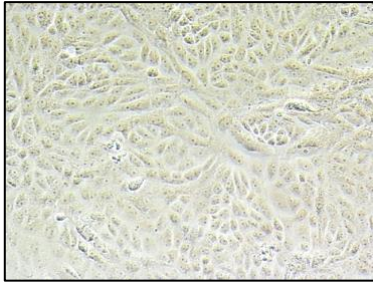

**B**

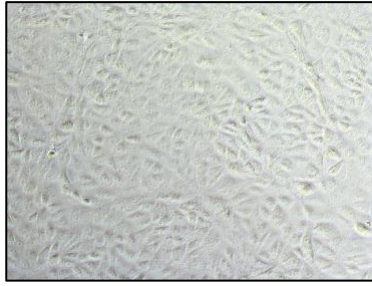

- A. Media only
- B. Media + Both Anti-Stx1 and Anti-Stx2 antisera

**II.**

**C**

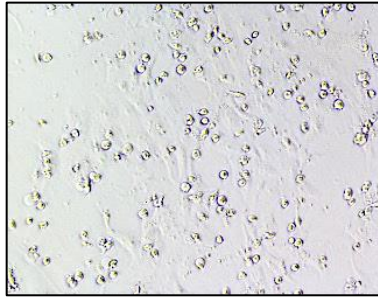

**D**

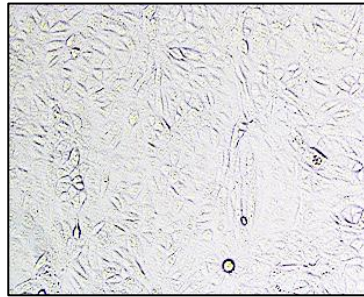

- C. Vero cells with Stx1 at 1:64
- D. Vero cells with Stx1 at 1:64 + Anti-Stx1 antisera

**E**

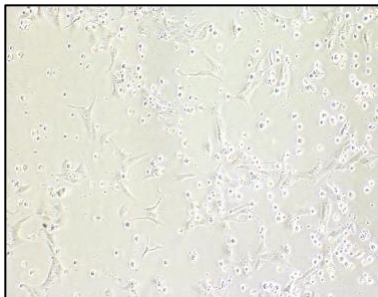

**F**

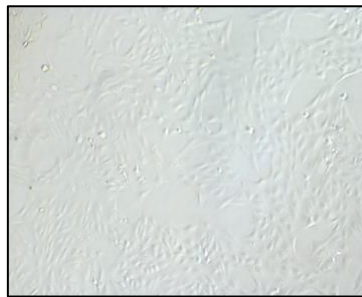

- E. Vero cells with Stx2 at 1:256
- F. Vero cells with Stx2 at 1:256 + Anti-Stx2 antisera

**III.**

**G**

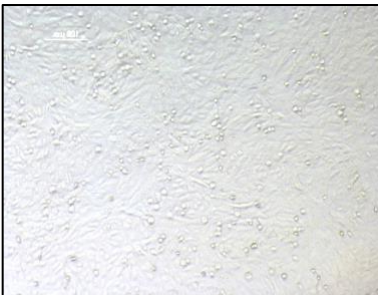

**H**

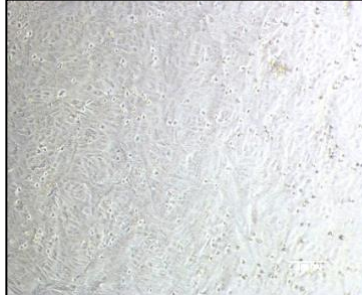

- G. Vero cells with Undiluted 5915 fecal extract
- H. Vero cells with Undiluted 5915 fecal extract + Both Anti-Stx1 and Anti-Stx2 antisera

**Supplementary Figure 2. Vero cell cytotoxicity assay.**

**I:** Assay controls with media only (**A**), media and antisera (**B**) on Vero cells are shown.

**II:** Diluted Stx, and diluted Stx with anti-Stx sera are shown as described in the inserted legends. Cytopathic effects of Stx1 at 1:64 dilution (**C**) and Stx2 at 1:256 dilution (**E**) on the Vero cells, as also the protection of the Vero cells in the presence of antisera, anti-Stx1 (**D**) and anti-Stx2 (**F**), is shown.

**III:** Absence of cytopathic effects with undiluted fecal extracts from animal 5951 is shown (**G, H**). All images were captured at 10x magnification using an inverted microscope.
