# Supplementary material for: Evaluation of Cattle for Naturally Colonized Shiga Toxin-Producing Escherichia coli Requires Combinatorial Strategies
Source: Hindawi journal article supplement (doi:10.1155/2021/6673202), 2021-04-01
Supplement: f1 [file 6673202.f1.zip]

### A. Colony PCR

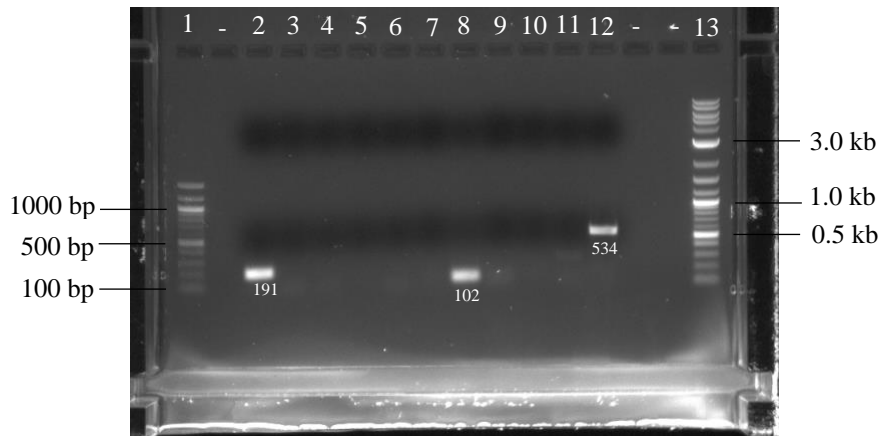

### B. Fecal-DNA PCR

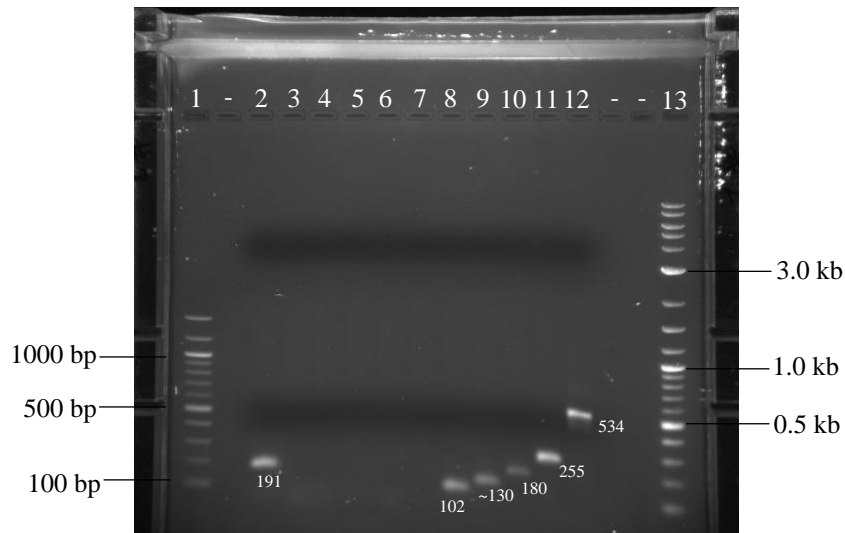

**Supplementary Figure 1. Representative colony (A) and fecal-DNA (B) PCR results are shown for animal 5760.** PCR reactions were analyzed by electrophoresis on a 4% agarose gel and loaded in Lanes 1-13 as: 100bp ladder, O103, O111, O121, O145, O26, O45, *eae*, *stx*, *stx1*, *stx2*, *hlyA*, 2-log ladder. Amplicon sizes in bp, as expected, are shown.
